# Supplementary material for: A Novel Feedback Loop That Controls Bimodal Expression of Genetic Competence
Source: PubMed Central journal article supplement (PMC4482431; doi:10.1371/journal.pgen.1005047), 2015-06-25
Supplement: pgen.1005047.s011.pdf [file pgen.1005047.s011.pdf]

|                 | <b>LB<br/>LOG</b> | <b>LB + glc<br/>LOG</b> | <b>LB<br/>STAT</b> | <b>LB + glc<br/>STAT</b> |
|-----------------|-------------------|-------------------------|--------------------|--------------------------|
| 1 <sup>st</sup> | 0.18% (552)       | 0.30% (676)             | 3.34% (569)        | 14.64% (649)             |
| 2 <sup>nd</sup> | 0.22% (455)       | 0.92% (653)             | 1.92% (626)        | 15.29% (883)             |
